# Supplementary material for: Evidence of a Mild Mutator Phenotype in Cambodian Plasmodium falciparum Malaria Parasites
Source: PubMed Central journal article supplement (PMC4839739; doi:10.1371/journal.pone.0154166), 2016-04-21

# S1 Figure

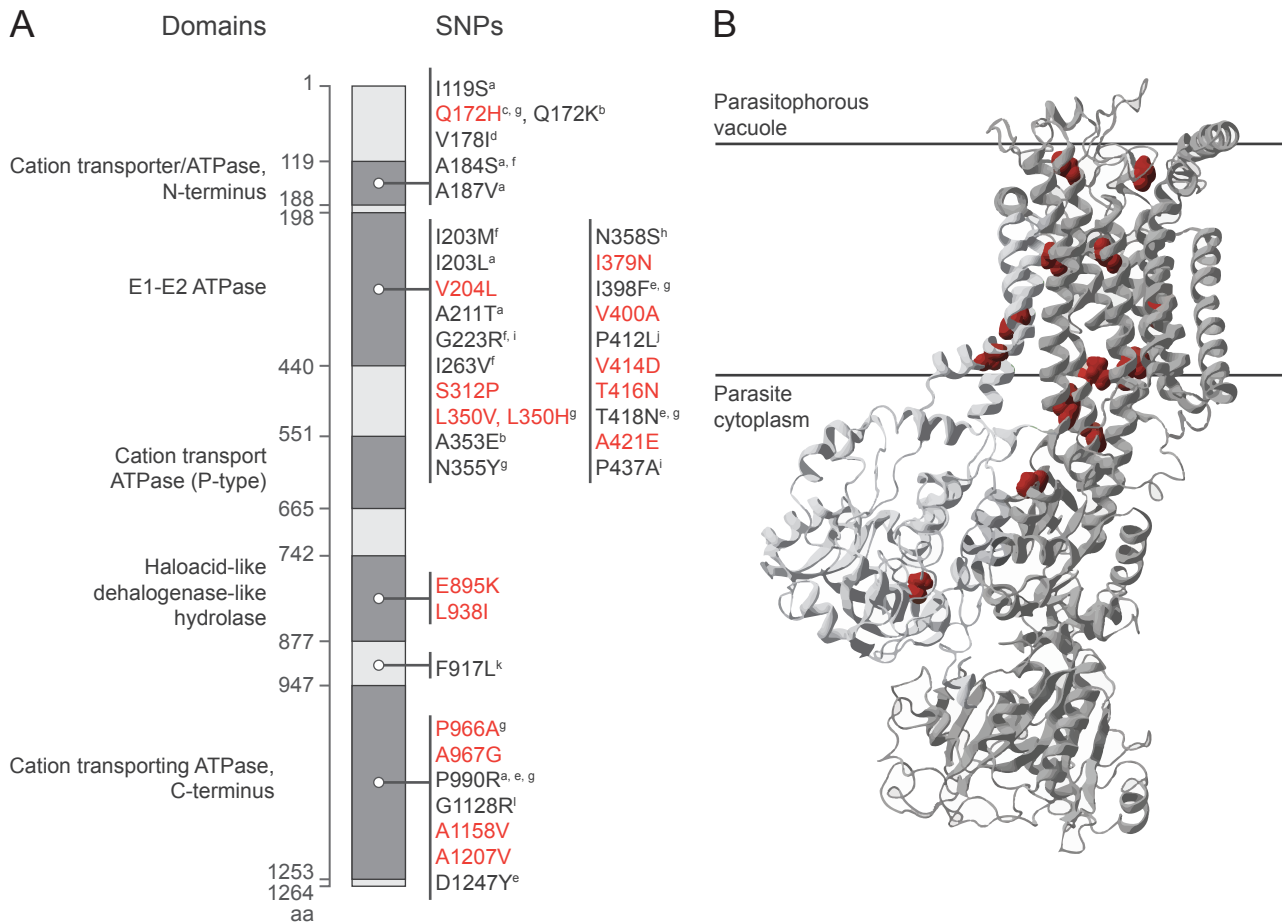

Supplement: pone.0154166.s001.pdf [file pone.0154166.s001.pdf]
