# Supplementary material for: Evidence of a Mild Mutator Phenotype in Cambodian Plasmodium falciparum Malaria Parasites
Source: PubMed Central journal article supplement (PMC4839739; doi:10.1371/journal.pone.0154166), 2016-04-21
Supplement: pone.0154166.s002.pdf [file pone.0154166.s002.pdf]

**S1 Table. Origins, alternative names, and drug resistance haplotypes of the strains used in this study.**

|                                    | <b>3D7</b>  | <b>V1/S</b>      | <b>W2</b> | <b>Dd2</b> | <b>Dd2 <i>exo1A</i></b> | <b>PH0167-C<sup>a</sup></b> | <b>PH0306-C<sup>a,b</sup></b> | <b>PH0164-C<sup>a,b</sup></b> | <b>PH0482-C<sup>a</sup></b> | <b>PH0212-C<sup>a</sup></b> |
|------------------------------------|-------------|------------------|-----------|------------|-------------------------|-----------------------------|-------------------------------|-------------------------------|-----------------------------|-----------------------------|
| <b>Original ID</b>                 | -           | -                | -         | -          | -                       | RF 918                      | RF 967                        | RF 915                        | RF 976                      | RF 986                      |
| <b>Sanger ID</b>                   | -           | -                | -         | -          | -                       | PH0167-C                    | PH0306-C                      | PH0164-C                      | PH0482-C                    | PH0212-C                    |
| <b>Other ID<sup>b</sup></b>        | -           | -                | -         | -          | -                       | -                           | Cam3.II                       | CamWT                         | -                           | -                           |
| <b><i>k13</i></b>                  | WT          | WT               | WT        | WT         | WT                      | WT                          | WT                            | R539T                         | C580Y                       | C580Y                       |
| <b><i>pfert</i></b>                | WT          | Dd2 <sup>c</sup> | Dd2       | Dd2        | Dd2                     | Dd2                         | Dd2                           | Dd2                           | Dd2                         | Dd2                         |
| <b><i>KH group</i><sup>d</sup></b> | -           | -                | -         | -          | -                       | 1                           | 1                             | 3                             | 2                           | 2                           |
| <b>Origin</b>                      | Netherlands | Vietnam          | Vietnam   | W2-mef     | Dd2                     | Cambodia                    | Cambodia                      | Cambodia                      | Cambodia                    | Cambodia                    |
| <b>Year</b>                        | 1970s       | 1980             | 1980      | 1980s      | 2014                    | 2010                        | 2010                          | 2010                          | 2010                        | 2010                        |

<sup>a</sup> Published in [20]. <sup>b</sup> Published in [21]. <sup>c</sup> Dd2 *pfert* allele: 74I/75D/76T/220S/271E/326S/356T/371I. <sup>d</sup> KH groups are Cambodian subpopulation cluster groups determined in [9].
